# Supplementary material
Source: PubMed Central journal article supplement (PMC9449598)
Supplement: EMMM-14-e15997-s002.pdf [file EMMM-14-e15997-s002.pdf]

## Appendix Supplementary Methods

| <i>EXO-CD24 repeated-dose toxicity study in mice, 7 days follow up</i>                                                                                                        |             |
|-------------------------------------------------------------------------------------------------------------------------------------------------------------------------------|-------------|
| <b>Table</b>                                                                                                                                                                  | <b>Page</b> |
| Animal weight (main group)                                                                                                                                                    | 2           |
| Animal weight (recovery group)                                                                                                                                                | 3           |
| Food consumption (main group)                                                                                                                                                 | 3           |
| Food consumption (recovery group)                                                                                                                                             | 3           |
| Organ weight (main group)                                                                                                                                                     | 4           |
| Organ weight (recovery group)                                                                                                                                                 | 5           |
| Urine Analysis (main group)                                                                                                                                                   | 5           |
| Urine Analysis (recovery group)                                                                                                                                               | 6           |
| Clinical Pathology: <ul style="list-style-type: none"><li>• Hematology (main group)</li><li>• Hematology (recovery group)</li><li>• Clinical chemistry (main group)</li></ul> | 7           |
| Clinical chemistry ( recovery group)                                                                                                                                          | 8           |

**EXO-CD24 repeated-dose toxicity study in mice, 7 days follow up.**

**1. Animal Weight (gram)**

Animal weight, main groups:

| group     | recovery | mouse | weight   | weight   | weight   | weight   | weight   | weight   | weight   |
|-----------|----------|-------|----------|----------|----------|----------|----------|----------|----------|
| Vehicle   |          | 8951  | 18.5     | 18.3     | 18.1     | 18       | 18.4     | 18.3     | 18.1     |
|           |          | 8952  | 19       | 18.8     | 18.7     | 18.7     | 19.1     | 19.1     | 19.2     |
|           |          | 8953  | 19.3     | 18.7     | 19.2     | 19       | 18.8     | 18.7     | 18.8     |
|           |          | 8954  | 18.5     | 18.1     | 18.3     | 18.2     | 18.3     | 18.1     | 18.5     |
|           |          | 8955  | 19.3     | 19.7     | 19.4     | 19.2     | 19.2     | 19.5     | 19.4     |
|           | AVERAGE  |       | 18.92    | 18.72    | 18.74    | 18.62    | 18.76    | 18.74    | 18.8     |
|           | SEM      |       | 0.18     | 0.276405 | 0.2502   | 0.22891  | 0.180555 | 0.256125 | 0.234521 |
| Mid dose  |          | 8959  | 17.4     | 17.6     | 17.6     | 18.3     | 18.1     | 18.5     | 18.4     |
|           |          | 8960  | 19.8     | 19.7     | 19.5     | 19.3     | 19.3     | 19       | 19.1     |
|           |          | 8961  | 20       | 20.1     | 20.6     | 20.6     | 20.5     | 20.3     | 20.6     |
|           |          | 8962  | 19.7     | 19.7     | 19.8     | 19.9     | 20       | 20.1     | 19.8     |
|           |          | 8963  | 19.4     | 19.6     | 20.4     | 20.7     | 20.6     | 20.6     | 20.9     |
|           |          | 8964  | 17.8     | 18.1     | 17.9     | 18.2     | 18.5     | 18.8     | 18.7     |
|           |          | 8965  | 18.8     | 18.9     | 19.2     | 19.2     | 19.4     | 19.3     | 19.5     |
|           |          | 8966  | 18.5     | 18.9     | 19       | 18.9     | 18.8     | 18.5     | 18.8     |
|           | AVERAGE  |       | 18.925   | 19.075   | 19.25    | 19.3875  | 19.4     | 19.3875  | 19.475   |
|           | SEM      |       | 0.341609 | 0.307496 | 0.380789 | 0.336175 | 0.324037 | 0.295464 | 0.320574 |
| High dose |          | 8970  | 19       | 18.5     | 18.7     | 18.8     | 18.7     | 18.6     | 18.7     |
|           |          | 8971  | 20.1     | 19.7     | 20.1     | 19.8     | 20.1     | 20.2     | 19.9     |
|           |          | 8972  | 19       | 18.7     | 18.9     | 18.6     | 18.6     | 18.9     | 19.1     |
|           |          | 8973  | 17       | 16       | 16.5     | 16.7     | 17.1     | 17.2     | 17       |
|           |          | 8974  | 19.4     | 18.8     | 19.5     | 19.5     | 19.8     | 20       | 20.2     |
|           |          | 8975  | 19       | 19.4     | 19.3     | 19.5     | 19.3     | 19.1     | 19.4     |
|           |          | 8976  | 19.3     | 18.5     | 18.9     | 19.2     | 18.8     | 18.9     | 18.8     |
|           |          | 8977  | 19.3     | 18.4     | 18.7     | 19       | 19.2     | 18.9     | 19       |
|           | AVERAGE  |       | 19.0125  | 18.5     | 18.825   | 18.8875  | 18.95    | 18.975   | 19.0125  |
|           | SEM      |       | 0.314777 | 0.392792 | 0.372132 | 0.34249  | 0.323485 | 0.323899 | 0.341968 |

Animal weight, recovery groups:

| Group     |          | Mouse # | Day 0 | Day 1 | Day 2 | Day 3 | Day 4 | Day 5 |
|-----------|----------|---------|-------|-------|-------|-------|-------|-------|
| Vehicle   | Recovery | 8956    | 18.9  | 18.1  | 18.2  | 18.5  | 18.7  | 18.5  |
|           |          | 8957    | 20.2  | 19    | 19.8  | 19.6  | 19.6  | 19.8  |
|           |          | 8958    | 19    | 19.1  | 19.4  | 18.9  | 19.2  | 19.4  |
|           |          |         | 19.37 | 18.73 | 19.13 | 19.00 | 19.17 | 19.23 |
|           |          |         | 0.34  | 0.26  | 0.39  | 0.26  | 0.21  | 0.31  |
| Mid dose  | Recovery | 8967    | 18.6  | 18.4  | 18.2  | 18.4  | 18.3  | 17.9  |
|           |          | 8968    | 17.5  | 17    | 18.2  | 17.8  | 18.1  | 17.9  |
|           |          | 8969    | 20.2  | 20    | 20.9  | 20.6  | 20.3  | 20    |
|           |          |         | 18.77 | 18.47 | 19.10 | 18.93 | 18.90 | 18.60 |
|           |          |         | 0.64  | 0.71  | 0.73  | 0.69  | 0.57  | 0.57  |
| High dose | Recovery | 8978    | 19.2  | 18.1  | 18.6  | 18.2  | 18.5  | 18.5  |
|           |          | 8979    | 18.2  | 17.9  | 18.1  | 18.1  | 18.2  | 17.8  |
|           |          | 8980    | 20    | 19.7  | 19.5  | 19.5  | 19.3  | 19.2  |
|           |          |         | 19.13 | 18.57 | 18.73 | 18.60 | 18.67 | 18.50 |

## 2. Food Consumption.

Food was weighed weekly.

Food consumption, main groups (gram):

| Group     | No of mice | Day 0 | Day 6 | Total Gr | per mouse |
|-----------|------------|-------|-------|----------|-----------|
| Vehicle   | 5          | 389gr | 267   | 122      | 24.4      |
| Mid dose  | 8          | 402gr | 214.8 | 187.2    | 23.4      |
| High dose | 8          | 386gr | 189.2 | 196.8    | 24.6      |

Food consumption, recovery groups (gram):

| Group     | No of mice | Day 0 | Day 6 | Total Gr | Per mouse | Day 13  | Total Gr | Per mouse |
|-----------|------------|-------|-------|----------|-----------|---------|----------|-----------|
| Vehicle   | 3          | 405gr | 333.9 | 71.1     | 23.7      | 259.3gr | 74.6     | 24.8      |
| Mid dose  | 3          | 375gr | 300.7 | 74.3     | 24.7      | 229.2gr | 71.5     | 23.8      |
| High dose | 3          | 392gr | 324.1 | 67.9     | 22.6      | 251.2gr | 72.9     | 24.3      |

### 3. Organ Weight.

After sacrifice, animal organs were isolated and weighed.

Organ weight, main groups (gram).

| group     | mouse   | brain    | heart    | lungs    | thymus   | spleen   | kidneys  | liver    |
|-----------|---------|----------|----------|----------|----------|----------|----------|----------|
| Vehicle   | 8951    | 0.429    | 0.109    | 0.268    | 0.051    | 0.078    | 0.244    | 0.813    |
|           | 8952    | 0.447    | 0.122    | 0.269    | 0.042    | 0.086    | 0.252    | 0.872    |
|           | 8953    | 0.449    | 0.091    | 0.397    | 0.051    | 0.083    | 0.247    | 0.789    |
|           | 8954    | 0.448    | 0.095    | 0.276    | 0.047    | 0.091    | 0.24     | 0.759    |
|           | 8955    | 0.458    | 0.104    | 0.285    | 0.051    | 0.093    | 0.28     | 0.913    |
|           | AVERAGE | 0.4462   | 0.1042   | 0.299    | 0.0484   | 0.0862   | 0.2526   | 0.8292   |
|           | SEM     | 0.004228 | 0.004894 | 0.022082 | 0.00159  | 0.002423 | 0.006372 | 0.025029 |
| Mid dose  | 8959    | 0.429    | 0.089    | 0.279    | 0.058    | 0.063    | 0.212    | 0.737    |
|           | 8960    | 0.43     | 0.085    | 0.395    | 0.034    | 0.063    | 0.245    | 0.78     |
|           | 8961    | 0.435    | 0.101    | 0.249    | 0.044    | 0.071    | 0.27     | 0.779    |
|           | 8962    | 0.433    | 0.1      | 0.315    | 0.183    | 0.444    | 0.301    | 1.184    |
|           | 8963    | 0.417    | 0.099    | 0.318    | 0.035    | 0.07     | 0.229    | 0.733    |
|           | 8964    | 0.414    | 0.096    | 0.272    | 0.048    | 0.087    | 0.222    | 0.81     |
|           | 8965    | 0.437    | 0.094    | 0.388    | 0.039    | 0.068    | 0.25     | 0.718    |
|           | 8966    | 0.414    | 0.11     | 0.352    | 0.038    | 0.069    | 0.251    | 0.696    |
|           | AVERAGE | 0.426125 | 0.09675  | 0.321    | 0.059875 | 0.116875 | 0.2475   | 0.804625 |
|           | SEM     | 0.003393 | 0.002724 | 0.019049 | 0.017808 | 0.046807 | 0.010041 | 0.055778 |
| High dose | 8970    | 0.406    | 0.086    | 0.386    | 0.036    | 0.074    | 0.285    | 0.762    |
|           | 8971    | 0.449    | 0.102    | 0.357    | 0.041    | 0.094    | 0.273    | 0.82     |
|           | 8972    | 0.423    | 0.09     | 0.32     | 0.033    | 0.086    | 0.26     | 0.745    |
|           | 8973    | 0.433    | 0.107    | 0.371    | 0.042    | 0.078    | 0.245    | 0.678    |
|           | 8974    | 0.403    | 0.101    | 0.348    | 0.035    | 0.075    | 0.282    | 0.763    |
|           | 8975    | 0.406    | 0.108    | 0.336    | 0.053    | 0.072    | 0.254    | 0.682    |
|           | 8976    | 0.446    | 0.107    | 0.321    | 0.07     | 0.077    | 0.252    | 0.766    |
|           | 8977    | 0.394    | 0.115    | 0.338    | 0.038    | 0.081    | 0.249    | 0.792    |
|           | AVERAGE | 0.42     | 0.102    | 0.347125 | 0.0435   | 0.079625 | 0.2625   | 0.751    |
|           | SEM     | 0.007382 | 0.003423 | 0.008243 | 0.004371 | 0.00257  | 0.005467 | 0.017453 |

## Organ weight, recovery groups (gram)

| Group     | Mouse # | Brain | Hear  | Lungs | Thymus | Spleen | Kidneys | Liver |
|-----------|---------|-------|-------|-------|--------|--------|---------|-------|
| Vehicle   | 8956    | 0.445 | 0.126 | 0.308 | 0.034  | 0.085  | 0.3     | 0.994 |
|           | 8957    | 0.448 | 0.124 | 0.271 | 0.041  | 0.097  | 0.238   | 0.982 |
|           | 8958    | 0.444 | 0.109 | 0.357 | 0.046  | 0.103  | 0.289   | 1.143 |
|           | AVERAGE | 0.446 | 0.120 | 0.312 | 0.040  | 0.095  | 0.276   | 1.040 |
|           | SEM     | 0.001 | 0.004 | 0.020 | 0.003  | 0.004  | 0.016   | 0.042 |
| Mid dose  | 8967    | 0.439 | 0.095 | 0.274 | 0.05   | 0.097  | 0.241   | 0.864 |
|           | 8968    | 0.425 | 0.092 | 0.259 | 0.041  | 0.084  | 0.224   | 0.779 |
|           | 8969    | 0.442 | 0.093 | 0.229 | 0.046  | 0.086  | 0.257   | 1.03  |
|           | AVERAGE | 0.435 | 0.093 | 0.254 | 0.046  | 0.089  | 0.241   | 0.891 |
|           | SEM     | 0.004 | 0.001 | 0.011 | 0.002  | 0.003  | 0.008   | 0.060 |
| High dose | 8978    | 0.447 | 0.102 | 0.26  | 0.051  | 0.092  | 0.247   | 0.9   |
|           | 8979    | 0.44  | 0.085 | 0.277 | 0.051  | 0.087  | 0.255   | 0.802 |
|           | 8980    | 0.45  | 0.1   | 0.287 | 0.049  | 0.1    | 0.265   | 0.977 |
|           | AVERAGE | 0.446 | 0.096 | 0.275 | 0.050  | 0.093  | 0.256   | 0.893 |
|           | SEM     | 0.002 | 0.004 | 0.006 | 0.001  | 0.003  | 0.004   | 0.041 |

## 4. Urine Analysis

On termination day, urine was collected and analyzed.

Urine analysis results, main groups:

| group     | mouse    | Leukocytes | Urobilinogen | Bilirubin (mg/dL) | Blood    | Nitrite  | pH   | Specific Gravity | Protein(mg/dL) | Glucose  | Keytone  |
|-----------|----------|------------|--------------|-------------------|----------|----------|------|------------------|----------------|----------|----------|
| Vehicle   | 8951     | negative   | Normal       | 0.5               | negative | negative | 5    | 1.03             | 30             | negative | negative |
|           | 8952     | negative   | Normal       | 0.5               | negative | negative | 6    | 1.03             | 30             | negative | negative |
|           | 8953     | negative   | Normal       | 0.5               | negative | negative | 6    | 1.03             | 30             | negative | negative |
|           | 8954     | negative   | Normal       | 0.5               | negative | negative | 5    | 1.03             | 30             | negative | negative |
|           | 8955     | negative   | Normal       | 0.5               | negative | negative | 6    | 1.03             | 30             | negative | negative |
| Mid dose  | 8959     | negative   | Normal       | 0.5               | negative | negative | 6    | 1.03             | 30             | negative | negative |
|           | 8960     | negative   | Normal       | 0.5               | negative | negative | 5    | 1.03             | 30             | negative | negative |
|           | 8961     | negative   | Normal       | 0.5               | negative | negative | 6    | 1.03             | 30             | negative | negative |
|           | 8962     | negative   | Normal       | 0.5               | negative | negative | 6    | 1.03             | 30             | negative | negative |
|           | 8963     | negative   | Normal       | 0.5               | negative | negative | 6    | 1.03             | 30             | negative | negative |
|           | 8964     | negative   | Normal       | 0.5               | negative | negative | 6    | 1.03             | 30             | negative | negative |
|           | 8965     | negative   | Normal       | 0.5               | negative | negative | 6    | 1.03             | 30             | negative | negative |
| 8966      | negative | Normal     | 0.5          | negative          | negative | 5        | 1.03 | 30               | negative       | negative |          |
| High dose | 8970     | negative   | Normal       | 0.5               | negative | negative | 5    | 1.03             | 30             | negative | negative |
|           | 8971     | negative   | Normal       | 0.5               | negative | negative | 6    | 1.03             | 30             | negative | negative |
|           | 8972     | negative   | Normal       | 0.5               | negative | negative | 6    | 1.03             | 30             | negative | negative |
|           | 8973     | negative   | Normal       | 0.5               | negative | negative | 5    | 1.03             | 30             | negative | negative |
|           | 8974     | negative   | Normal       | 0.5               | negative | negative | 5    | 1.03             | 30             | negative | negative |
|           | 8975     | negative   | Normal       | 0.5               | negative | negative | 6    | 1.03             | 30             | negative | negative |
|           | 8976     | negative   | Normal       | 0.5               | negative | negative | 6    | 1.03             | 30             | negative | negative |
| 8977      | negative | Normal     | 0.5          | negative          | negative | 6        | 1.03 | 30               | negative       | negative |          |

Urine analysis results, recovery groups

| Group     | mouse | Leukocytes | Urobilinogen | Bilirubin (mg/dL) | Blood    | Nitrite  | pH | Specific Gravity |
|-----------|-------|------------|--------------|-------------------|----------|----------|----|------------------|
| Vehicle   | 8956  | Negative   | Normal       | 0.5               | Negative | Negative | 6  | 1.03             |
|           | 8957  | Negative   | Normal       | 0.5               | Negative | Negative | 5  | 1.03             |
|           | 8958  | Negative   | Normal       | 0.5               | Negative | Negative | 6  | 1.03             |
|           |       |            |              |                   |          |          |    |                  |
| Mid dose  | 8967  | Negative   | Normal       | 0.5               | Negative | Negative | 5  | 1.03             |
|           | 8968  | Negative   | Normal       | 0.5               | Negative | Negative | 5  | 1.03             |
|           | 8969  | Negative   | Normal       | 0.5               | Negative | Negative | 6  | 1.03             |
|           |       |            |              |                   |          |          |    |                  |
| High dose | 8978  | Negative   | Normal       | 0.5               | Negative | Negative | 6  | 1.03             |
|           | 8979  | Negative   | Normal       | 0.5               | Negative | Negative | 5  | 1.03             |
|           | 8980  | Negative   | Normal       | 0.5               | Negative | Negative | 5  | 1.03             |

Urine analysis results, recovery groups (continue):

| Group     | mouse | Protein (mg/dL) | Glucose  | Ketone   |
|-----------|-------|-----------------|----------|----------|
| Vehicle   | 8956  | 30              | Negative | Negative |
|           | 8957  | 30              | Negative | Negative |
|           | 8958  | 30              | Negative | Negative |
|           |       |                 |          |          |
| Mid dose  | 8967  | 30              | Negative | Negative |
|           | 8968  | 30              | Negative | Negative |
|           | 8969  | 30              | Negative | Negative |
|           |       |                 |          |          |
| High dose | 8978  | 30              | Negative | Negative |
|           | 8979  | 30              | Negative | Negative |
|           | 8980  | 30              | Negative | Negative |



Clinical chemistry results, recovery groups:

|              |                              | <b>Creat</b>   | <b>Calc</b>     | <b>Phos</b>     | <b>Gluc</b>       | <b>Urea</b>       | <b>Chol</b>       | <b>TP</b>      |
|--------------|------------------------------|----------------|-----------------|-----------------|-------------------|-------------------|-------------------|----------------|
|              |                              | <b>mg/dl</b>   | <b>mg/dl</b>    | <b>mg/dl</b>    | <b>mg/dl</b>      | <b>mg/dl</b>      | <b>mg/dl</b>      | <b>g/dl</b>    |
| <b>group</b> | <b>Animal No. /Reference</b> | <b>0.1-0.4</b> | <b>8.9-14.5</b> | <b>3.5-19.8</b> | <b>46.0-282.0</b> | <b>18.0-103.9</b> | <b>51.0-239.0</b> | <b>1.0-6.8</b> |
| Vehicle      | 8956                         | 0.21           | 10.38           | 8.20            | 100.00            | 47.00             | 120.00            | 5.59           |
|              | 8957                         | 0.21           | 10.44           | 7.80            | 144.00            | 38.50             | 104.00            | 5.35           |
|              | 8958                         | 0.20           | 10.03           | 8.90            | 112.00            | 40.70             | 117.00            | 5.47           |
|              | AVERAGE                      | 0.21           | 10.28           | 8.30            | 118.67            | 42.07             | 113.67            | 5.47           |
|              | SEM                          | 0.00           | 0.10            | 0.26            | 10.72             | 2.08              | 4.01              | 0.06           |
| Mid dose     | 8967                         | 0.18           | 9.59            | 7.70            | 129.00            | 48.00             | 102.00            | 5.17           |
|              | 8968                         | 0.19           | 9.72            | 8.20            | 134.00            | 55.40             | 100.00            | 5.32           |
|              | 8969                         | 0.18           | 10.03           | 7.60            | 158.00            | 41.30             | 105.00            | 5.16           |
|              | AVERAGE                      | 0.18           | 9.78            | 7.83            | 140.33            | 48.23             | 102.33            | 5.22           |
|              | SEM                          | 0.00           | 0.11            | 0.15            | 7.31              | 3.32              | 1.19              | 0.04           |
| High dose    | 8978                         | 0.19           | 9.85            | 7.70            | 150.00            | 50.80             | 107.00            | 5.16           |
|              | 8979                         | 0.18           | 10.13           | 8.40            | 136.00            | 32.60             | 109.00            | 5.35           |
|              | 8980                         | 0.26           | 10.41           | 8.60            | 129.00            | 41.20             | 119.00            | 5.53           |
|              | AVERAGE                      | 0.21           | 10.13           | 8.23            | 138.33            | 41.53             | 111.67            | 5.35           |
|              | SEM                          | 0.02           | 0.13            | 0.22            | 5.04              | 4.29              | 3.03              | 0.09           |

|              |                              | <b>SGPT</b>       | <b>Trig</b>         | <b>CPK</b>  | <b>Na</b>          | <b>K</b>        | <b>Cl</b>     | <b>GGTP</b> |
|--------------|------------------------------|-------------------|---------------------|-------------|--------------------|-----------------|---------------|-------------|
|              |                              | <b>IU/L</b>       | <b>mg/dl</b>        | <b>IU/L</b> | <b>mmol/L</b>      | <b>mmol/L</b>   | <b>mmol/L</b> | <b>IU/L</b> |
| <b>group</b> | <b>Animal No. /Reference</b> | <b>15.0-296.0</b> | <b>15.00-309.01</b> |             | <b>149.0-167.0</b> | <b>4.9-11.2</b> | <b>95-115</b> |             |
| Vehicle      | 8956                         | 40.00             | 204.00              | 1475.00     | 154.00             | 8.10            | 112.00        | 0.00        |
|              | 8957                         | 36.00             | 238.00              | 1666.00     | 152.00             | 7.60            | 111.00        | 0.00        |
|              | 8958                         | 34.00             | 161.00              | 1046.00     | 153.00             | 7.50            | 110.00        | 0.00        |
|              | AVERAGE                      | 36.67             | 201.00              | 1395.67     | 153.00             | 7.73            | 111.00        | 0.00        |
|              | SEM                          | 1.44              | 18.19               | 149.68      | 0.47               | 0.15            | 0.47          | 0.00        |
| Mid dose     | 8967                         | 41.00             | 228.00              | 1482.00     | 151.00             | 7.50            | 115.00        | 0.00        |
|              | 8968                         | 42.00             | 227.00              | 1993.00     | 152.00             | 7.80            | 115.00        | 0.00        |
|              | 8969                         | 41.00             | 202.00              | 1173.00     | 151.00             | 7.90            | 116.00        | 0.00        |
|              | AVERAGE                      | 41.33             | 219.00              | 1549.33     | 151.33             | 7.73            | 115.33        | 0.00        |
|              | SEM                          | 0.27              | 6.94                | 195.22      | 0.27               | 0.10            | 0.27          | 0.00        |
| High dose    | 8978                         | 38.00             | 130.00              | 1380.00     | 153.00             | 7.80            | 114.00        | 0.00        |
|              | 8979                         | 45.00             | 134.00              | 1592.00     | 152.00             | 8.10            | 114.00        | 0.00        |
|              | 8980                         | 40.00             | 217.00              | 1901.00     | 154.00             | 8.00            | 113.00        | 0.00        |
|              | AVERAGE                      | 41.00             | 160.33              | 1624.33     | 153.00             | 7.97            | 113.67        | 0.00        |
|              | SEM                          | 1.70              | 23.15               | 123.51      | 0.47               | 0.07            | 0.27          | 0.00        |

|              |                              | <b>Alb</b>     | <b>Glob</b>    | <b>Alb/Glob</b> | <b>T. Bil</b>  | <b>Phos</b>       | <b>LDH</b>      | <b>SGOT</b>       |
|--------------|------------------------------|----------------|----------------|-----------------|----------------|-------------------|-----------------|-------------------|
|              |                              | <b>g/dl</b>    | <b>g/dl</b>    | <b>Ratio</b>    | <b>mg/dl</b>   | <b>IU/L</b>       | <b>IU/L</b>     | <b>IU/L</b>       |
| <b>group</b> | <b>Animal No. /Reference</b> | <b>2.0-4.9</b> | <b>1.3-3.6</b> |                 | <b>0.1-0.3</b> | <b>29.0-356.0</b> | <b>255-1879</b> | <b>36.0-361.0</b> |
| Vehicle      | 8956                         | 4.00           | 1.59           | 2.53            | 0.10           | 251.00            | 1615.00         | 134.00            |
|              | 8957                         | 3.80           | 1.55           | 2.33            | 0.08           | 220.00            | 1013.00         | 144.00            |
|              | 8958                         | 4.00           | 1.47           | 2.74            | 0.14           | 200.00            | 1410.00         | 128.00            |
|              | AVERAGE                      | 3.93           | 1.54           | 2.53            | 0.11           | 223.67            | 1346.00         | 135.33            |
|              | SEM                          | 0.05           | 0.03           | 0.10            | 0.01           | 12.11             | 144.28          | 3.81              |
| Mid dose     | 8967                         | 4.00           | 1.17           | 2.62            | 0.09           | 220.00            | 1085.00         | 138.00            |
|              | 8968                         | 4.10           | 1.22           | 3.02            | 0.08           | 227.00            | 1069.00         | 171.00            |
|              | 8969                         | 4.00           | 1.16           | 2.46            | 0.06           | 201.00            | 554.00          | 124.00            |
|              | AVERAGE                      | 4.03           | 1.18           | 2.70            | 0.08           | 216.00            | 902.67          | 144.33            |
|              | SEM                          | 0.03           | 0.02           | 0.14            | 0.01           | 6.34              | 142.39          | 11.38             |
| High dose    | 8978                         | 3.90           | 1.26           | 2.66            | 0.09           | 201.00            | 886.00          | 145.00            |
|              | 8979                         | 4.10           | 1.25           | 2.65            | 0.06           | 200.00            | 1026.00         | 164.00            |
|              | 8980                         | 4.20           | 1.33           | 2.75            | 0.12           | 234.00            | 1303.00         | 158.00            |
|              | AVERAGE                      | 4.07           | 1.28           | 2.69            | 0.09           | 211.67            | 1071.67         | 155.67            |
|              | SEM                          | 0.07           | 0.02           | 0.03            | 0.01           | 9.12              | 100.04          | 4.58              |
